# Supplementary material
Source: PubMed Central journal article supplement (PMC7956055)
Supplement: NIHMS1670624-supplement-Supplemental_material.pdf [file NIHMS1670624-supplement-Supplemental_material.pdf]

## **SUPPLEMENTAL MATERIAL**

### **Understanding Characteristics of Who Undergoes Testing is Crucial for the Development of Diagnostic Strategies to Identify Individuals at Risk for Early-age Onset Colorectal Cancer**

Ravy K. Vajravelu MD MSCE, Shivan J. Mehta MD MBA MSHP, and James D. Lewis MD  
MSCE on behalf of the EOCRC TrEnDS Study Group

| <b>CONTENTS</b>                                                                                                                                                                       | <b>PAGE</b> |
|---------------------------------------------------------------------------------------------------------------------------------------------------------------------------------------|-------------|
| Supplemental methods                                                                                                                                                                  | 2           |
| Supplemental table 1. General population cohort demographic characteristics stratified by year                                                                                        | 3           |
| Supplemental figure 1. Trends in incidence rates of risk factors potentially eligible for early CRC screening or for diagnostic evaluation among the general population ages 18 – 49. | 4           |

**Supplemental methods: General population cohort inclusion and exclusion criteria**

Optum contains patient-level data from April 1, 2000 – June 30, 2019. We used data from January 1, 2004 – December 31, 2018 to derive the study results. We chose 2004 as the study start year because it was the first year Optum captured complete inpatient data. We also used data from April 1, 2000 – December 31, 2003 to assess exclusion criteria.

Individuals 18 – 49 years-old without gaps in enrollment were eligible for inclusion in the general population cohort. Individuals with the following symptom, conditions, and procedures within the first 180 days of enrollment were excluded because they may reflect underlying prevalent EOCRC or they could have led to testing that incidentally diagnosed prevalent EOCRC.

- Symptoms and conditions: Abdominal pain, arteriovenous malformations of the intestine, bowel obstruction, celiac disease, change in bowel habits, cholangitis, cholecystitis, constipation, diarrhea, diverticulitis, fatigue, functional dyspepsia, gastroparesis, hemorrhoids, *Helicobacter pylori* infection, inflammatory bowel disease, iron deficiency anemia, irritable bowel syndrome, menorrhagia, nausea/vomiting, pancreatitis, rectal bleeding, small intestinal bacterial overgrowth, weight loss
- Procedures: Colonoscopy, flexible sigmoidoscopy, fecal occult blood testing, fecal immunochemical testing, fecal immunochemical testing-fecal DNA testing, CT colonography, barium enema, CT-abdomen/pelvis, MRI-abdomen/pelvis

For individuals without exclusions, follow-up started on the later of 181 days after enrollment, age 18, or January 1, 2004. Follow-up ended on the earlier of the last day of enrollment, age 50, the day after EOCRC diagnosis, or December 31, 2018. Individuals with fewer than 180 days of follow-up were excluded.

Supplemental table 1. General population cohort demographic characteristics stratified by year

| Year | n       | Person-years | Female (%) | Race/ethnicity (%) |       |          |       |         | Age (%) |         |         |         | Black race and<br>45 – 49 (%) |
|------|---------|--------------|------------|--------------------|-------|----------|-------|---------|---------|---------|---------|---------|-------------------------------|
|      |         |              |            | Asian              | Black | Hispanic | White | Unknown | 18 – 29 | 30 – 39 | 40 – 44 | 45 – 49 |                               |
| 2004 | 6952240 | 5569843      | 51         | 4                  | 7     | 10       | 60    | 19      | 30      | 34      | 19      | 18      | 1                             |
| 2005 | 7014261 | 5627166      | 51         | 4                  | 7     | 10       | 60    | 19      | 30      | 33      | 19      | 18      | 1                             |
| 2006 | 6949004 | 5624830      | 50         | 4                  | 7     | 11       | 59    | 18      | 31      | 33      | 18      | 18      | 1                             |
| 2007 | 6836400 | 5524038      | 50         | 5                  | 8     | 11       | 59    | 17      | 32      | 33      | 18      | 18      | 1                             |
| 2008 | 6480982 | 5392348      | 50         | 5                  | 8     | 11       | 60    | 16      | 32      | 32      | 17      | 18      | 1                             |
| 2009 | 6089985 | 5104117      | 50         | 5                  | 9     | 11       | 61    | 13      | 32      | 32      | 17      | 18      | 2                             |
| 2010 | 5631243 | 4761991      | 50         | 5                  | 9     | 12       | 63    | 11      | 32      | 32      | 17      | 18      | 2                             |
| 2011 | 5438966 | 4617969      | 50         | 5                  | 10    | 12       | 64    | 9       | 33      | 32      | 17      | 18      | 2                             |
| 2012 | 5247172 | 4486072      | 49         | 6                  | 9     | 12       | 65    | 8       | 34      | 32      | 17      | 17      | 2                             |
| 2013 | 5148812 | 4334437      | 49         | 6                  | 9     | 12       | 65    | 8       | 35      | 32      | 17      | 17      | 2                             |
| 2014 | 4886066 | 4022659      | 49         | 6                  | 9     | 13       | 64    | 8       | 35      | 32      | 16      | 16      | 1                             |
| 2015 | 4918253 | 3979028      | 48         | 6                  | 9     | 14       | 62    | 9       | 35      | 33      | 16      | 16      | 1                             |
| 2016 | 5013661 | 4043789      | 48         | 6                  | 9     | 14       | 59    | 11      | 36      | 33      | 15      | 16      | 1                             |
| 2017 | 4921598 | 3971881      | 48         | 6                  | 9     | 14       | 57    | 14      | 36      | 33      | 15      | 16      | 1                             |
| 2018 | 4813848 | 3859205      | 48         | 5                  | 8     | 12       | 51    | 24      | 36      | 34      | 15      | 16      | 1                             |

**Supplemental figure 1. Trends in incidence rates of risk factors potentially eligible for early CRC screening or for diagnostic evaluation among the general population ages 18 – 49.**

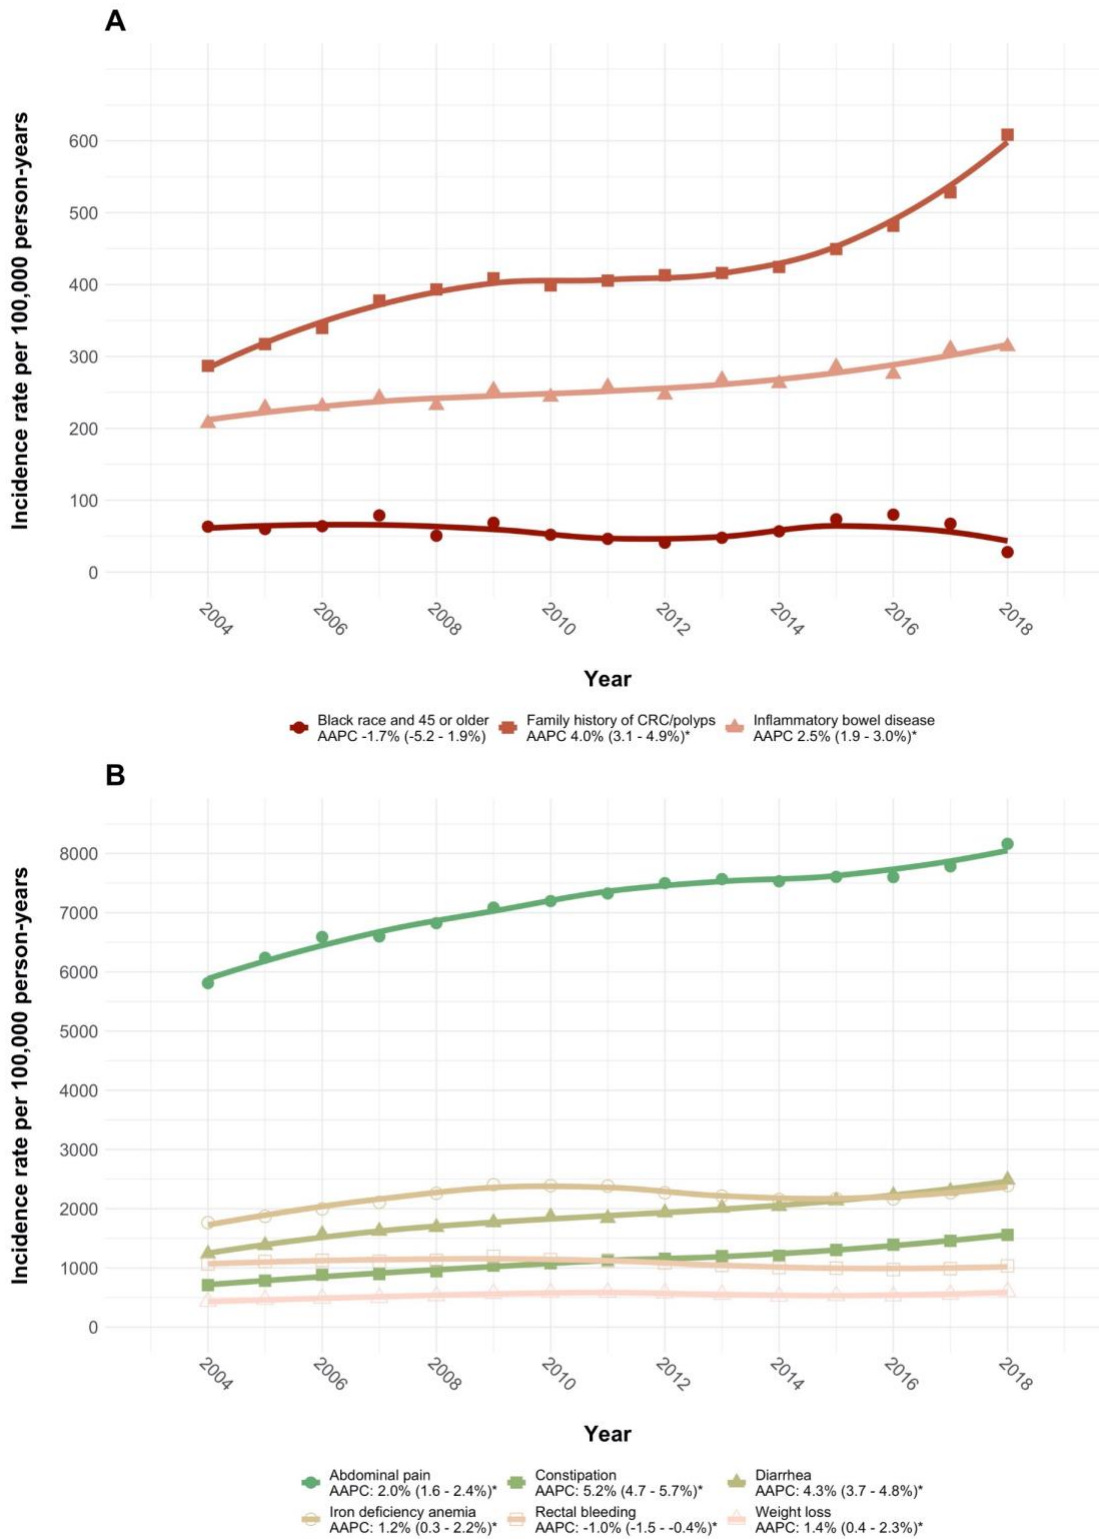

Panel A: Trend in incidence rates of risk factors eligible for early CRC screening

Panel B: Trend in incidence rates of alarm and non-alarm symptoms eligible for diagnostic evaluation

Notes: \* Indicates AAPC 95% CI does not cross 0. Smooth trend lines were generated using LOESS.
